# Supplementary material for: Influence of organic cation planarity on structural templating in hybrid metal-halides
Source: Royal Society of Chemistry journal article supplement (doi:10.1039/c9dt03207j), 2019-01-01
Supplement: c9dt03207j1.pdf [file c9dt03207j1.pdf]

Supporting information for

**Influence of organic cation planarity on structural templating in hybrid metal-halides**

Iain W. H. Oswald, Hyochul Ahn, and James R. Neilson\*

\*corresponding author: J. R. N. (James.Neilson@colostate.edu)

Department of Chemistry, Colorado State University, Fort Collins, CO, 80523-1872, United States

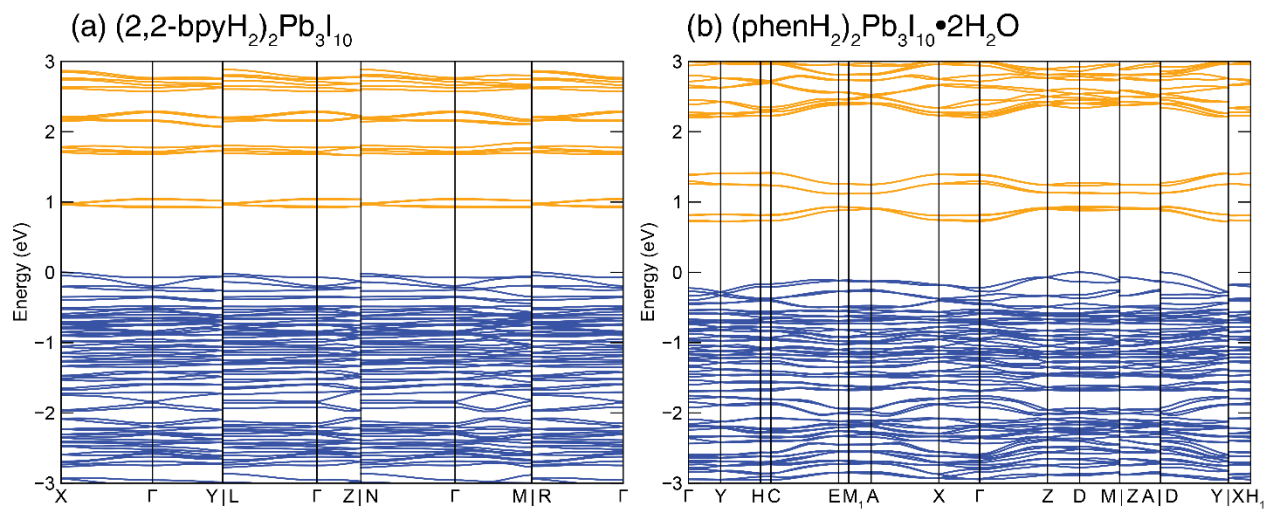

**Figure S1.** Band structures of (a)  $(2,2\text{-bpyH}_2)_2\text{Pb}_3\text{I}_{10}$  and (b)  $(\text{phenH}_2)_2\text{Pb}_3\text{I}_{10}\cdot 2\text{H}_2\text{O}$ .

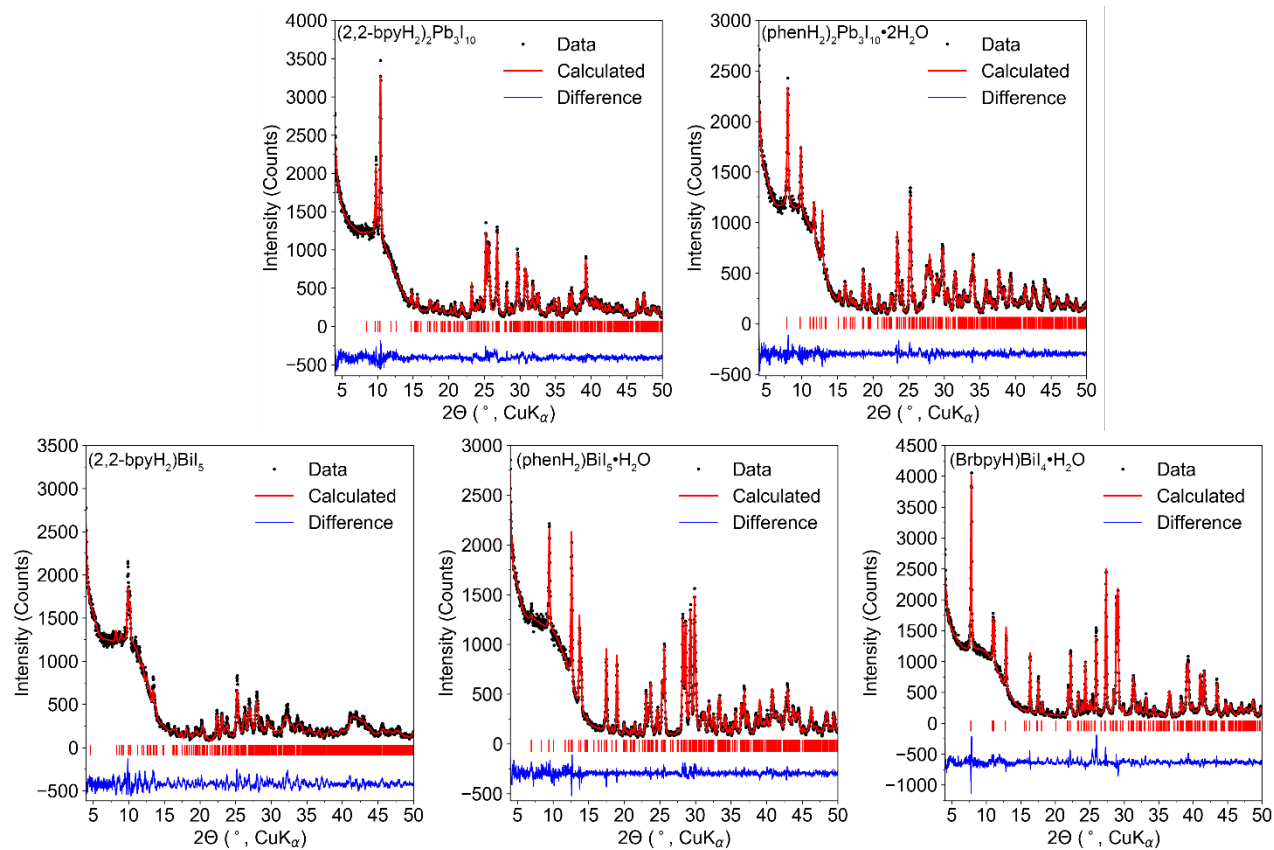

**Figure S2.** Powder diffraction patterns for all compounds.

**Table S1.** Atomic Positions and Thermal Parameters obtained from single crystal diffraction.

| Compound/Atom                                                                      | <i>x</i>    | <i>y</i>    | <i>z</i>    | <i>U</i> <sub>iso</sub> <sup>*</sup> / <i>U</i> <sub>eq</sub> | Occupancy (<1) |
|------------------------------------------------------------------------------------|-------------|-------------|-------------|---------------------------------------------------------------|----------------|
| <b>(2,2-bpyH<sub>2</sub>)<sub>2</sub>Pb<sub>3</sub>I<sub>10</sub></b>              |             |             |             |                                                               |                |
| Pb1                                                                                | 0.35414 (2) | 0.73440 (3) | 0.55324 (2) | 0.03809 (9)                                                   |                |
| Pb2                                                                                | ½           | 0.72704 (4) | ¾           | 0.04067 (11)                                                  |                |
| I1                                                                                 | 0.24478 (2) | 0.50023 (5) | 0.49378 (2) | 0.03932 (12)                                                  |                |
| I2                                                                                 | 0.46307 (2) | 0.96512 (5) | 0.62693 (3) | 0.04497 (13)                                                  |                |
| I3                                                                                 | 0.34868 (3) | 0.69645 (6) | 0.71471 (3) | 0.04736 (13)                                                  |                |
| I4                                                                                 | 0.46668 (2) | 0.50470 (5) | 0.62091 (3) | 0.04738 (13)                                                  |                |
| I5                                                                                 | 0.35964 (3) | 0.72084 (5) | 0.40329 (3) | 0.04879 (14)                                                  |                |
| N1                                                                                 | 0.1956 (3)  | 0.1828 (7)  | 0.3353 (4)  | 0.066 (2)                                                     |                |
| H1A                                                                                | 0.211071    | 0.108885    | 0.360414    | 0.079*                                                        |                |
| N2                                                                                 | 0.3451 (3)  | 0.3628 (6)  | 0.4013 (3)  | 0.0429 (14)                                                   |                |
| H2A                                                                                | 0.328379    | 0.444268    | 0.393051    | 0.051*                                                        |                |
| C1                                                                                 | 0.1325 (5)  | 0.1930 (10) | 0.2985 (6)  | 0.078 (3)                                                     |                |
| H1                                                                                 | 0.106510    | 0.119972    | 0.299387    | 0.094*                                                        |                |
| C2                                                                                 | 0.1051 (4)  | 0.3085 (9)  | 0.2595 (5)  | 0.055 (2)                                                     |                |
| H2                                                                                 | 0.060768    | 0.316610    | 0.233651    | 0.066*                                                        |                |
| C3                                                                                 | 0.1446 (4)  | 0.4107 (8)  | 0.2597 (4)  | 0.055 (2)                                                     |                |
| H3                                                                                 | 0.127285    | 0.491669    | 0.233873    | 0.066*                                                        |                |
| C4                                                                                 | 0.2103 (4)  | 0.3977 (7)  | 0.2976 (4)  | 0.053 (2)                                                     |                |
| H4                                                                                 | 0.236717    | 0.469985    | 0.296962    | 0.063*                                                        |                |
| C5                                                                                 | 0.2370 (4)  | 0.2814 (7)  | 0.3356 (4)  | 0.0345 (15)                                                   |                |
| C6                                                                                 | 0.3055 (4)  | 0.2526 (7)  | 0.3761 (4)  | 0.0374 (16)                                                   |                |
| C7                                                                                 | 0.3329 (4)  | 0.1238 (7)  | 0.3899 (4)  | 0.0434 (17)                                                   |                |
| H7                                                                                 | 0.306999    | 0.045849    | 0.372904    | 0.052*                                                        |                |
| C8                                                                                 | 0.3981 (4)  | 0.1084 (8)  | 0.4284 (4)  | 0.0499 (19)                                                   |                |
| H8                                                                                 | 0.416151    | 0.020279    | 0.438099    | 0.060*                                                        |                |
| C9                                                                                 | 0.4368 (4)  | 0.2233 (9)  | 0.4526 (5)  | 0.055 (2)                                                     |                |
| H9                                                                                 | 0.481157    | 0.214692    | 0.478153    | 0.066*                                                        |                |
| C10                                                                                | 0.4079 (4)  | 0.3518 (9)  | 0.4377 (4)  | 0.0498 (19)                                                   |                |
| H10                                                                                | 0.432891    | 0.431175    | 0.453529    | 0.060*                                                        |                |
| <b>(phenH<sub>2</sub>)<sub>2</sub>Pb<sub>3</sub>I<sub>10</sub>•2H<sub>2</sub>O</b> |             |             |             |                                                               |                |
| Pb1                                                                                | 0.39548 (3) | 0.65516 (2) | 0.55077 (2) | 0.03377 (9)                                                   |                |
| Pb2                                                                                | 0           | ½           | ½           | 0.03677 (11)                                                  |                |
| I1                                                                                 | 0.41918 (6) | 0.87036 (3) | 0.54441 (3) | 0.04281 (14)                                                  |                |

|                                               |             |             |             |              |
|-----------------------------------------------|-------------|-------------|-------------|--------------|
| I2                                            | 0.32710 (6) | 0.41678 (3) | 0.56505 (3) | 0.04477 (14) |
| I3                                            | 0.57536 (7) | 0.64950 (4) | 0.70231 (3) | 0.04915 (15) |
| I4                                            | 0.18245 (6) | 0.63098 (4) | 0.38597 (3) | 0.04802 (14) |
| I5                                            | 0.06379 (7) | 0.67440 (4) | 0.61182 (3) | 0.05097 (15) |
| O1                                            | 0.1665 (9)  | 0.3217 (5)  | 0.7243 (5)  | 0.0522 (17)  |
| H1B                                           | 0.116 (9)   | 0.285 (5)   | 0.749 (4)   | 0.03 (2)*    |
| H2B                                           | 0.147 (14)  | 0.332 (7)   | 0.692 (6)   | 0.06 (4)*    |
| N1                                            | 0.1298 (7)  | 0.5030 (4)  | 0.7812 (4)  | 0.0387 (14)  |
| H1A                                           | 0.143512    | 0.454118    | 0.754046    | 0.046*       |
| N2                                            | 0.4305 (7)  | 0.4119 (4)  | 0.7879 (3)  | 0.0360 (13)  |
| H2A                                           | 0.357769    | 0.391089    | 0.757282    | 0.043*       |
| C1                                            | 0.9919(10)  | 0.5460 (6)  | 0.7758 (5)  | 0.049 (2)    |
| H1                                            | 0.08684     | 0.522767    | 0.743113    | 0.059*       |
| C2                                            | 0.9644 (10) | 0.6254 (5)  | 0.8183 (5)  | 0.0454 (18)  |
| H2                                            | 0.867958    | 0.655600    | 0.814659    | 0.054*       |
| C3                                            | 0.0820 (10) | 0.6579 (5)  | 0.8656 (5)  | 0.0424 (18)  |
| H3                                            | 0.065122    | 0.711156    | 0.894274    | 0.051*       |
| C4                                            | 0.2296 (9)  | 0.6125 (4)  | 0.8720 (4)  | 0.0378 (16)  |
| C5                                            | 0.3508 (10) | 0.6437 (5)  | 0.9228 (5)  | 0.0447 (19)  |
| H5                                            | 0.334695    | 0.696218    | 0.952431    | 0.054*       |
| C6                                            | 0.4887 (10) | 0.5986 (5)  | 0.9289 (5)  | 0.0484 (19)  |
| H6                                            | 0.566775    | 0.619254    | 0.963070    | 0.058*       |
| C7                                            | 0.5148 (9)  | 0.5189 (5)  | 0.8828 (4)  | 0.0400 (17)  |
| C8                                            | 0.6631 (9)  | 0.4721 (5)  | 0.8868 (5)  | 0.0462 (19)  |
| H8                                            | 0.742051    | 0.491538    | 0.920970    | 0.055*       |
| C9                                            | 0.6872 (10) | 0.3983 (6)  | 0.8396 (5)  | 0.051 (2)    |
| H9                                            | 0.783197    | 0.367602    | 0.840928    | 0.062*       |
| C10                                           | 0.5672 (10) | 0.3701 (5)  | 0.7899 (5)  | 0.0470 (19)  |
| H10                                           | 0.583688    | 0.320539    | 0.757397    | 0.056*       |
| C11                                           | 0.3985 (8)  | 0.4863 (4)  | 0.8317 (4)  | 0.0306 (14)  |
| C12                                           | 0.2502 (8)  | 0.5328 (4)  | 0.8279 (4)  | 0.0314 (14)  |
| <b>(2,2-bpy H<sub>2</sub>)BiI<sub>5</sub></b> |             |             |             |              |
| Bi1                                           | 0.84182 (4) | 0.89613 (3) | 0.78618 (2) | 0.04403 (10) |
| Bi2                                           | 0.81019 (4) | 0.23816 (3) | 0.63546 (2) | 0.04626 (10) |
| I1                                            | 0.05312 (7) | 0.12386 (6) | 0.74055 (4) | 0.05246 (17) |
| I2                                            | 0.58133 (8) | 0.31398 (8) | 0.54417 (4) | 0.0668 (2)   |

|     |              |              |             |              |
|-----|--------------|--------------|-------------|--------------|
| I3  | 0.37961 (8)  | 0.40309 (8)  | 0.89835 (5) | 0.0728 (2)   |
| I4  | 0.62408 (9)  | 0.71195 (8)  | 0.81399 (5) | 0.0759 (2)   |
| I5  | 0.82469 (10) | 0.48609 (8)  | 0.67677 (5) | 0.0826 (3)   |
| I6  | 0.87260 (10) | 0.91509 (10) | 0.93567 (4) | 0.0821 (3)   |
| I7  | 0.61998 (7)  | 0.12940 (7)  | 0.77021 (4) | 0.05882 (18) |
| I8  | 0.81569 (7)  | 0.92277 (6)  | 0.62017 (3) | 0.05373 (17) |
| I9  | 0.05784 (7)  | 0.69711 (6)  | 0.79158 (4) | 0.06069 (19) |
| I10 | 0.00867 (7)  | 0.29120 (7)  | 0.51846 (3) | 0.05360 (17) |
| N1  | 0.3920 (11)  | 0.0644 (11)  | 0.9306 (6)  | 0.0830 (15)  |
| H1A | 0.405955     | 0.143088     | 0.933310    | 0.100*       |
| N2  | 0.0401 (12)  | 0.3958 (11)  | 0.9380 (6)  | 0.0889 (16)  |
| H2A | 0.125271     | 0.393495     | 0.944094    | 0.107*       |
| N3  | 0.4209 (9)   | 0.5823 (9)   | 0.6894 (6)  | 0.0690 (9)   |
| H3A | 0.483428     | 0.627962     | 0.701164    | 0.083*       |
| N4  | 0.2055 (9)   | 0.8444 (9)   | 0.6074 (5)  | 0.0690 (9)   |
| H4A | 0.132620     | 0.802876     | 0.608312    | 0.083*       |
| C1  | 0.3103 (14)  | 0.0439 (14)  | 0.8837 (7)  | 0.0830 (15)  |
| H1  | 0.270291     | 0.111643     | 0.853699    | 0.100*       |
| C2  | 0.2853 (14)  | 0.9253 (14)  | 0.8796 (7)  | 0.0830 (15)  |
| H2  | 0.221107     | 0.911205     | 0.848114    | 0.100*       |
| C3  | 0.3441 (13)  | 0.8241 (14)  | 0.9169 (7)  | 0.0830 (15)  |
| H3  | 0.327053     | 0.741621     | 0.909595    | 0.100*       |
| C4  | 0.4452 (13)  | 0.8488 (14)  | 0.9746 (7)  | 0.0830 (15)  |
| H4  | 0.490427     | 0.78385      | 0.995808    | 0.100*       |
| C5  | 0.4580 (14)  | 0.9743 (15)  | 0.9758 (7)  | 0.0830 (15)  |
| C6  | 0.9970 (14)  | 0.3293 (14)  | 0.8926 (8)  | 0.0889 (16)  |
| H6  | 0.056796     | 0.283152     | 0.868065    | 0.107*       |
| C7  | 0.8662 (14)  | 0.3290 (14)  | 0.8823 (8)  | 0.0889 (16)  |
| H7  | 0.832262     | 0.274951     | 0.854293    | 0.107*       |
| C8  | 0.7835 (15)  | 0.4062 (14)  | 0.9122 (8)  | 0.0889 (16)  |
| H8  | 0.692356     | 0.410877     | 0.902861    | 0.107*       |
| C9  | 0.8367 (14)  | 0.4822 (14)  | 0.9590 (8)  | 0.0889 (16)  |
| H9  | 0.781584     | 0.541598     | 0.977467    | 0.107*       |
| C10 | 0.9653 (15)  | 0.4669 (14)  | 0.9759 (8)  | 0.0889 (16)  |
| C11 | 0.4274 (12)  | 0.4545 (10)  | 0.7101 (7)  | 0.0690 (9)   |
| H11 | 0.500141     | 0.417801     | 0.735931    | 0.083*       |

|     |             |             |            |            |
|-----|-------------|-------------|------------|------------|
| C12 | 0.3332 (11) | 0.3798 (11) | 0.6947 (7) | 0.0690 (9) |
| H12 | 0.338096    | 0.291594    | 0.709598   | 0.083*     |
| C13 | 0.2281 (12) | 0.4366 (11) | 0.6560 (7) | 0.0690 (9) |
| H13 | 0.159761    | 0.386565    | 0.644578   | 0.083*     |
| C14 | 0.2228 (12) | 0.5676 (10) | 0.6337 (7) | 0.0690 (9) |
| H14 | 0.151702    | 0.604734    | 0.606612   | 0.083*     |
| C15 | 0.3180 (12) | 0.6416 (11) | 0.6504 (7) | 0.0690 (9) |
| C16 | 0.3182 (12) | 0.7791 (11) | 0.6298 (7) | 0.0690 (9) |
| C17 | 0.4298 (12) | 0.8500 (11) | 0.6273 (7) | 0.0690 (9) |
| H17 | 0.510791    | 0.809221    | 0.641579   | 0.083*     |
| C18 | 0.4267 (12) | 0.9800 (10) | 0.6043 (7) | 0.0690 (9) |
| H18 | 0.504436    | 0.026332    | 0.603674   | 0.083*     |
| C19 | 0.3077 (11) | 0.0414 (11) | 0.5822 (7) | 0.0690 (9) |
| H19 | 0.302471    | 0.129516    | 0.566816   | 0.083*     |
| C20 | 0.2008 (12) | 0.9693 (11) | 0.5838 (7) | 0.0690 (9) |
| H20 | 0.119788    | 0.007969    | 0.567923   | 0.083*     |

**(phenH<sub>2</sub>)BiI<sub>5</sub>•H<sub>2</sub>O**

|     |              |             |             |              |
|-----|--------------|-------------|-------------|--------------|
| Bi1 | ½            | 0.71572 (4) | ¾           | 0.02875 (13) |
| Bi2 | 0            | 0.33968 (4) | ¾           | 0.02972 (13) |
| I1  | 0.92366 (8)  | 0.34299 (6) | 0.58652 (3) | 0.04739 (19) |
| I2  | 0.37890 (9)  | 0.71449 (6) | 0.58970 (3) | 0.04663 (19) |
| I3  | 0.77106 (8)  | 0.18062 (6) | 0.76121 (4) | 0.0534 (2)   |
| I4  | 0.25724 (8)  | 0.52978 (6) | 0.76379 (5) | 0.0589 (2)   |
| I5  | 0.71907 (11) | 0.87722 (8) | 0.72499 (5) | 0.0729 (3)   |
| N2  | 0.9093 (9)   | 0.8490 (6)  | 0.5733 (4)  | 0.0399 (19)  |
| H2A | 0.940779     | 0.787550    | 0.587366    | 0.048*       |
| N1  | 0.7570 (9)   | 0.6640 (6)  | 0.5085 (5)  | 0.0396 (19)  |
| H1A | 0.829618     | 0.655946    | 0.543550    | 0.047*       |
| C5  | 0.5487 (12)  | 0.8794 (8)  | 0.4085 (6)  | 0.049 (3)    |
| H5  | 0.468861     | 0.887723    | 0.371126    | 0.058*       |
| C4  | 0.5959 (10)  | 0.7761 (8)  | 0.4308 (5)  | 0.037 (2)    |
| C11 | 0.7907 (10)  | 0.8563 (8)  | 0.5204 (5)  | 0.038 (2)    |
| C12 | 0.7152 (10)  | 0.7625 (7)  | 0.4870 (5)  | 0.0330 (19)  |
| C7  | 0.7376 (10)  | 0.9537 (7)  | 0.4970 (5)  | 0.037 (2)    |
| C9  | 0.9277 (14)  | 0.0316 (10) | 0.5866 (6)  | 0.054 (3)    |
| H9  | 0.972520     | 0.089887    | 0.610898    | 0.065*       |

|     |             |             |            |           |
|-----|-------------|-------------|------------|-----------|
| C3  | 0.5261 (13) | 0.6874 (9)  | 0.3988 (6) | 0.051 (3) |
| H3  | 0.445472    | 0.695152    | 0.361766   | 0.061*    |
| C2  | 0.5734 (13) | 0.5876 (9)  | 0.4205 (7) | 0.056 (3) |
| H2  | 0.528719    | 0.528187    | 0.397658   | 0.067*    |
| C6  | 0.6169 (12) | 0.9652 (8)  | 0.4401 (5) | 0.043 (2) |
| H6  | 0.584503    | 0.96808     | 0.424578   | 0.052*    |
| C10 | 0.9790 (12) | 0.9311 (10) | 0.6042 (6) | 0.053 (3) |
| H10 | 0.993571    | 0.921724    | 0.638606   | 0.063*    |
| C1  | 0.6896 (12) | 0.5794 (9)  | 0.4773 (6) | 0.050 (3) |
| H1  | 0.721293    | 0.513098    | 0.494080   | 0.060*    |
| C8  | 0.8100 (12) | 0.0424 (9)  | 0.5328 (6) | 0.047 (2) |
| H8  | 0.775721    | 0.109437    | 0.519016   | 0.056*    |
| O1  | 0.9928 (11) | 0.6522 (8)  | 0.6221 (6) | 0.076 (3) |
| H1B | 0.092 (4)   | 0.652 (12)  | 0.618 (8)  | 0.091*    |
| H2B | 0.962 (15)  | 0.621 (11)  | 0.660 (5)  | 0.091*    |

**(BrbpyH)BiI<sub>4</sub>•H<sub>2</sub>O**

|     |             |             |              |              |     |
|-----|-------------|-------------|--------------|--------------|-----|
| Bi1 | ½           | 0.91986 (2) | ¾            | 0.03140 (10) |     |
| I1  | 0.60717 (2) | 0.93344 (2) | 0.49435 (5)  | 0.03774 (11) |     |
| I2  | 0.38325 (3) | 0.79661 (2) | 0.52703 (6)  | 0.04507 (12) |     |
| Br1 | 0.31099 (5) | 0.56428 (4) | 0.43143 (10) | 0.05210 (18) |     |
| N1  | 0.4272 (3)  | 0.4506 (3)  | 0.6211 (7)   | 0.0357 (10)  |     |
| H1  | 0.453176    | 0.494432    | 0.670659     | 0.043*       | 0.5 |
| C1  | 0.3547 (4)  | 0.4571 (4)  | 0.4895 (8)   | 0.0386 (13)  |     |
| C2  | 0.3102 (4)  | 0.3894 (5)  | 0.4018 (9)   | 0.0498 (16)  |     |
| H2  | 0.259475    | 0.395277    | 0.310000     | 0.060*       |     |
| C3  | 0.3444 (5)  | 0.3127 (5)  | 0.4567 (10)  | 0.0591 (19)  |     |
| H3  | 0.317121    | 0.265692    | 0.399241     | 0.071*       |     |
| C4  | 0.4188 (5)  | 0.3056 (4)  | 0.5962 (10)  | 0.0517 (17)  |     |
| H4  | 0.440964    | 0.253969    | 0.635590     | 0.062*       |     |
| C5  | 0.4603 (4)  | 0.3768 (3)  | 0.6774 (8)   | 0.0360 (12)  |     |
| O1  | 0.500000    | 0.6065 (4)  | 0.750000     | 0.080 (3)    |     |
| H5  | 0.537 (4)   | 0.653 (3)   | 0.770 (13)   | 0.097*       |     |

---

<sup>a</sup> $U_{eq}$  is defined as one-third of the trace of the orthogonalized  $U_{ij}$  tensor.
